# Supplementary material for: Binding free energies in the SAMPL5 octa-acid host–guest challenge calculated with DFT-D3 and CCSD(T)
Source: PubMed Central journal article supplement (PMC5239813; doi:10.1007/s10822-016-9957-5), 2016-09-06

## **Supplementary material**

### **Binding free energies in the SAMPL5 octa-acid host–guest challenge calculated with DFT-D3 and CCSD(T)**

**Octav Caldararu,<sup>a</sup> Martin A. Olsson,<sup>a</sup> Christoph Riplinger,<sup>b</sup>**

**Frank Neese,<sup>b</sup> Ulf Ryde<sup>a\*</sup>**

<sup>a</sup> Department of Theoretical Chemistry, Lund University, Chemical Centre, P. O. Box 124,  
SE-221 00 Lund, Sweden

<sup>b</sup> Max-Planck-Institut für Chemische Energiekonversion, Stiftstraße 34-36, 45470 Mülheim an der  
Ruhr, Germany

Correspondence to Ulf Ryde, E-mail: [Ulf.Ryde@teokem.lu.se](mailto:Ulf.Ryde@teokem.lu.se),

Tel: +46 – 46 2224502, Fax: +46 – 46 2228648

2016-08-23

**Table S1.** Relative binding free energies for the nine ligand involved in the SAMPL4 blind test competition [22], calculated with FES using the OAH [27], NOH [72], and HOH host molecules.

|           | OAH         | HOH         | NOH         |
|-----------|-------------|-------------|-------------|
| MeBz→Bz   | 15.94 ±0.05 | 15.62 ±0.04 | 15.72 ±0.02 |
| EtBz→MeBz | 1.02 ±0.08  | 2.81 ±0.06  | 3.28 ±0.02  |
| pClBz→Bz  | 19.06 ±0.09 | 18.97 ±0.04 | 18.60 ±0.02 |
| mClBz→Bz  | 6.11 ±0.12  | 6.80 ±0.05  | 6.81 ±0.03  |
| Hx→Bz     | 13.14 ±0.32 | 14.74 ±0.09 | 15.60 ±0.05 |
| MeHx→Hx   | 15.35 ±0.15 | 14.84 ±0.03 | 14.81 ±0.01 |
| Hx→Pen    | 7.48 ±0.73  | 8.19 ±0.07  | 8.33 ±0.04  |
| Hep→Hx    | 5.50 ±0.66  | 7.44 ±0.09  | 7.35 ±0.07  |

**Table S2.** Comparison of the  $\Delta G_{\text{therm}}$  term calculated with HF-3c (also shown in Table 2) and MM.

| Host | Guest | HF-3c | MM   |
|------|-------|-------|------|
| OAH  | G1    | 77.9  | 75.1 |
|      | G2    | 71.3  | 72.9 |
|      | G3    | 96.2  | 72.8 |
|      | G4    | 101.1 | 77.5 |
|      | G5    | 90.1  | 57.7 |
|      | G6    | 72.2  | 71.2 |
| OAM  | G1    | 87.8  | 65.1 |
|      | G2    | 77.1  | 77.6 |
|      | G3    | 90.2  | 80.2 |
|      | G4    | 95.1  | 97.5 |
|      | G5    | 83.7  | 73.1 |
|      | G6    | 92.2  | 79.8 |

**Table S3.** PBE results, using fully relaxed structures.

| Host | Guest | $\Delta E_{\text{QM}}$ | $\Delta E_{\text{disp}}$ | $\Delta G_{\text{tot, rlx}}$ |
|------|-------|------------------------|--------------------------|------------------------------|
| OAH  | G1    | 965.4                  | -84.8                    | 54.1                         |
|      | G2    | 1365.3                 | -123.6                   | 2.0                          |
|      | G3    | -1005.5                | -154.3                   | 42.9                         |
|      | G4    | 953.5                  | -115.5                   | 1.0                          |
|      | G5    | -1022.0                | -148.1                   | 22.1                         |
|      | G6    | 905.4                  | -53.3                    | 3.1                          |
| NOH  | G1    | -62.9                  | -100.1                   | 65.3                         |
|      | G2    | -19.1                  | -94.9                    | 52.9                         |
|      | G3    | 24.2                   | -124.8                   | 56.0                         |
|      | G4    | -56.0                  | -123.6                   | 18.0                         |
|      | G5    | 6.7                    | -129.7                   | 19.0                         |
|      | G6    | -11.0                  | -112.9                   | 54.0                         |
| OAM  | G1    | 941.3                  | -79.2                    | 30.7                         |
|      | G2    | 950.5                  | -74.4                    | 25.4                         |
|      | G3    | -960.5                 | -136.9                   | 48.6                         |
|      | G4    | 1067.7                 | -121.1                   | 41.5                         |
|      | G5    | -954.1                 | -131.9                   | 14.8                         |
|      | G6    | 909.3                  | -56.9                    | 22.3                         |
| NOM  | G1    | -58.5                  | -100.3                   | 93.8                         |
|      | G2    | 14.4                   | -105.8                   | 69.1                         |
|      | G3    | 37.3                   | -131.6                   | 67.3                         |
|      | G4    | 17.8                   | -128.3                   | 70.4                         |
|      | G5    | 16.1                   | -111.3                   | 34.6                         |
|      | G6    | -42.1                  | -75.1                    | 35.0                         |

**Table S4.** Calculated energy components and absolute binding free energies (kJ/mol) obtained from the Boltzmann-averaged MD snapshots (MD) and one MD snapshot optimised with HF-3c in a COSMO continuum solvent without (Cos) or with four explicit water molecules (Wat). The energy terms are described in Eqn. 1.

| Host | Guest | MD                      |                        | Cos                      |                          |                         | Wat                    |                          |                          |                         |
|------|-------|-------------------------|------------------------|--------------------------|--------------------------|-------------------------|------------------------|--------------------------|--------------------------|-------------------------|
|      |       | $\Delta G_{\text{tot}}$ | $\Delta E_{\text{QM}}$ | $\Delta E_{\text{disp}}$ | $\Delta G_{\text{solv}}$ | $\Delta G_{\text{tot}}$ | $\Delta E_{\text{QM}}$ | $\Delta E_{\text{disp}}$ | $\Delta G_{\text{solv}}$ | $\Delta G_{\text{tot}}$ |
| NOH  | G1    | 41.4                    | -36.4                  | -105.5                   | 120.1                    | 53.9                    | -35.3                  | -92.6                    | 94.0                     | 41.8                    |
|      | G2    | 45.0                    | -6.7                   | -127.6                   | 87.8                     | 33.6                    | -9.5                   | -123.7                   | 90.0                     | 37.0                    |
|      | G3    | 13.7                    | 6.8                    | -112.9                   | 30.1                     | 12.1                    | 6.5                    | -116.5                   | 47.5                     | 25.5                    |
|      | G4    | 22.4                    | 3.3                    | -170.2                   | 108.4                    | 22.6                    | 1.9                    | -163.5                   | 99.3                     | 18.8                    |
|      | G5    | -0.9                    | 11.9                   | -134.2                   | 35.2                     | -5.9                    | 11.3                   | -135.7                   | 49.2                     | 6.1                     |
|      | G6    | 29.7                    | -6.8                   | -116.0                   | 70.4                     | 26.7                    | -2.6                   | -118.6                   | 55.8                     | 13.7                    |
| NOM  | G1    | 71.1                    | -36.8                  | -102.9                   | 126.7                    | 68.7                    | -28.2                  | -103.1                   | 103.2                    | 53.6                    |
|      | G2    | 48.1                    | 11.1                   | -128.1                   | 83.3                     | 44.7                    | 13.2                   | -130.7                   | 87.3                     | 48.2                    |
|      | G3    | 32.3                    | 15.6                   | -120.9                   | 43.0                     | 34.5                    | 19.2                   | -122.2                   | 40.9                     | 34.8                    |
|      | G4    | 37.3                    | 52.3                   | -181.1                   | 69.1                     | 38.9                    | 54.5                   | -184.5                   | 69.9                     | 38.4                    |
|      | G5    | 19.1                    | 23.1                   | -138.2                   | 48.9                     | 19.8                    | 22.4                   | -124.2                   | 45.4                     | 29.6                    |
|      | G6    | 18.2                    | -5.3                   | -109.3                   | 50.8                     | 16.2                    | 11.7                   | -135.0                   | 63.8                     | 20.5                    |

**Table S5.** Submitted data and experimental results ( $\Delta G_{\text{bind}}$  in kJ/mol relative to G1). In addition,  $R^2$  and MADtr compared to experiments are given, omitting G1. As discussed in the section “Submitted results” in the main article, these data contain several errors and suboptimal structures.

| Set    |       | Set 1   | Set 2   | Set 3   |       |
|--------|-------|---------|---------|---------|-------|
| Method |       | DFT     | DFT     | CCSD(T) | Exp.  |
| Host   |       | Neutral | Charged | Neutral |       |
| OAH    | G1    | 0.0     | 0.0     | 0.0     | 0.0   |
| or     | G2    | -15.9   | -4.6    | -28.9   | 3.1   |
| NOH    | G3    | 7.1     | -14.2   | 15.1    | 1.8   |
|        | G4    | -58.2   | -52.7   | -87.4   | -17.4 |
|        | G5    | -20.9   | -38.5   | -37.2   | 4.6   |
|        | G6    | -42.7   | -72.0   | -54.8   | 0.4   |
|        | $R^2$ | 0.48    | 0.14    | 0.47    |       |
|        | MADtr | 26.7    | 34.9    | 42.5    |       |
| OAM    | G1    | 0.0     | 0.0     | 0.0     | 0.0   |
| or     | G2    | -39.3   | -7.9    | -48.1   | 0.9   |
| NOM    | G3    | -46.9   | 5.4     | -42.3   | -2.1  |
|        | G4    | 23.0    | 54.0    | 22.2    | 12.5  |
|        | G5    | -18.8   | 38.5    | -23.0   | 6.1   |
|        | G6    | -66.1   | -7.5    | -82.8   | 3.7   |
|        | $R^2$ | 0.47    | 0.41    | 0.41    |       |
|        | MADtr | 38.0    | 20.3    | 42.9    |       |

**Table S6.** Amber topology files for NOH, NOM, and the six guest molecules, as well as the Amber parameter file for the missing dihedral angle of guest G2.

**noh.in**

```

0      0      2
oa0.dat
OA0, with RESP charges, 5/3-14
oa0.dat
  OA0  INT      1
CHANGE OMIT DU   BEG
0.00000
1  DUMM  DU   M   0.0000  0.0000  .0000  .0000
2  DUMM  DU   M   0.0000  1.0000  .0000  .0000
3  DUMM  DU   M   1.0000  1.0000  .0000  .0000
4  C55   ca   M  -1.5220  3.2080 -4.2130 -0.137304
5  H28   ha   E  -0.9350  3.9470 -3.6740  0.077201
6  C42   ca   M  -2.4280  2.4090 -3.5740 -0.011167
7  C56   ca   S  -3.2280  1.6060 -4.2980 -0.137304
8  H29   ha   E  -4.1010  1.1070 -3.8840  0.077201
9  C9     c3   M  -2.6020  2.4590 -2.0300  0.114807
10 O3     os   E  -2.3830  3.7840 -1.5580 -0.224878
11 H19    h2   E  -1.7860  1.8200 -1.6630  0.135169
12 O1     os   M  -3.8870  1.8990 -1.6480 -0.224878
13 C3     ca   M  -3.9100  1.1440 -0.5370  0.066965
14 C1     ca   M  -3.8090 -0.1940 -0.7940 -0.182589
15 H1     ha   E  -3.7770 -0.4960 -1.8380  0.203172
16 C4     ca   M  -3.5960 -1.0770  0.2820  0.066965
17 O2     os   E  -3.5150 -2.4080 -0.0920 -0.224878
18 C5     ca   M  -3.5760 -0.6530  1.6280  0.062476
19 C7     c3   3  -3.4220 -1.7270  2.6740 -0.029682
20 H12    hc   E  -4.0350 -1.4450  4.1080  0.057240
21 C32    ca   S  -1.9080 -2.1060  2.8250  0.062476
22 C31    ca   S  -1.0700 -1.3980  3.6830 -0.311116
23 H56    ha   E  -1.4800 -0.5880  4.2800  0.175692
24 H4     hc   E  -4.0520 -2.5450  2.3190  0.057240
25 C2     ca   M  -3.6140  0.7180  1.8500 -0.311116
26 H2     ha   E  -3.5190  1.1430  2.8460  0.175692
27 C6     ca   M  -3.8150  1.6430  0.7650  0.062476
28 C8     c3   M  -3.5870  3.1110  1.0700 -0.029682
29 H13    hc   E  -4.2140  3.7790  2.3520  0.057240
30 H3     hc   E  -4.0610  3.5940  0.2130  0.057240
31 C10    ca   M  -2.1180  3.3410  0.8270  0.062476
32 C15    ca   S  -1.2000  3.2470  1.8990 -0.311116
33 H5     ha   E  -1.4830  2.7760  2.8370  0.175692
34 C14    ca   M  -1.6790  3.8550 -0.3830  0.066965
35 C17    ca   M  -0.3540  4.2700 -0.5020 -0.182589
36 H6     ha   E  -0.0230  4.5760 -1.4910  0.203172
37 C13    ca   M   0.5180  4.3050  0.5390  0.066965
38 O4     os   S   1.9160  4.5440  0.3420 -0.224878
39 C34    c3   3   2.7380  3.3120  0.0870  0.114807
40 C41    ca   B   3.7170  3.4890 -1.0630 -0.011167
41 C50    ca   S   4.9700  2.8340 -1.1090 -0.137304
42 H25    ha   E   5.2320  2.2220 -0.2500  0.077201
43 C51    ca   S   3.2900  4.1570 -2.1870 -0.137304
44 H26    ha   E   2.3190  4.6440 -2.1600  0.077201
45 O5     os   E   3.3430  2.9830  1.3450 -0.224878
46 H18    h2   E   2.1180  2.4680 -0.2510  0.135169
47 C16    ca   M   0.0690  3.7170  1.7650  0.062476
48 C18    c3   M   0.9430  3.6670  3.0350 -0.029682
49 H14    hc   E   0.2660  4.1450  4.3360  0.057240
50 H7     hc   E   1.7670  4.3580  2.8390  0.057240
51 C19    ca   M   1.6220  2.2760  2.9700  0.062476
52 C23    ca   S   1.0540  1.2190  3.7130 -0.311116
53 H8     ha   E   0.1680  1.3470  4.3280  0.175692
54 C22    ca   M   2.7970  2.0530  2.2300  0.066965
55 C25    ca   M   3.4100  0.8020  2.2740 -0.182589
56 H9     ha   E   4.2770  0.6000  1.6510  0.203172
57 C21    ca   M   2.9540 -0.1560  3.1840  0.066965
58 O6     os   S   3.5260 -1.3650  2.9920 -0.224878
59 C38    c3   3   2.8680 -2.3720  2.1430  0.114807
60 C40    ca   B   3.7410 -3.0970  1.1560 -0.011167
61 C45    ca   S   4.6920 -2.4430  0.4170 -0.137304

```

|     |     |    |   |         |         |         |           |
|-----|-----|----|---|---------|---------|---------|-----------|
| 62  | H22 | ha | E | 4.8000  | -1.3670 | 0.5280  | 0.077201  |
| 63  | C46 | ca | S | 3.7040  | -4.5050 | 0.9540  | -0.137304 |
| 64  | H23 | ha | E | 3.0520  | -5.1060 | 1.5820  | 0.077201  |
| 65  | O7  | os | E | 2.0630  | -3.1990 | 3.0450  | -0.224878 |
| 66  | H20 | h2 | E | 2.1440  | -1.8390 | 1.5090  | 0.135169  |
| 67  | C24 | ca | M | 1.8100  | 0.0410  | 3.8860  | 0.062476  |
| 68  | C26 | c3 | M | 1.2020  | -1.0390 | 4.7470  | -0.029682 |
| 69  | H15 | hc | E | 0.5170  | -0.7400 | 6.1700  | 0.057240  |
| 70  | H10 | hc | E | 2.0710  | -1.6340 | 5.0360  | 0.057240  |
| 71  | C28 | ca | M | 0.2870  | -1.7610 | 3.8000  | 0.062476  |
| 72  | C30 | ca | M | 0.7650  | -2.8410 | 3.0580  | 0.066965  |
| 73  | C33 | ca | M | -0.0940 | -3.5100 | 2.1790  | -0.182589 |
| 74  | H11 | ha | E | 0.2760  | -4.3380 | 1.5800  | 0.203172  |
| 75  | C29 | ca | M | -1.3960 | -3.1670 | 2.0210  | 0.066965  |
| 76  | O8  | os | M | -2.2010 | -3.7230 | 1.1090  | -0.224878 |
| 77  | C39 | c3 | M | -2.2460 | -3.0170 | -0.1190 | 0.114807  |
| 78  | H21 | h2 | E | -1.4410 | -2.2680 | -0.1360 | 0.135169  |
| 79  | C43 | ca | M | -2.1220 | -3.8470 | -1.3610 | -0.011167 |
| 80  | C61 | ca | S | -2.8770 | -3.6480 | -2.4770 | -0.137304 |
| 81  | H32 | ha | E | -3.5880 | -2.8250 | -2.4940 | 0.077201  |
| 82  | C60 | ca | M | -1.1610 | -4.8870 | -1.5080 | -0.137304 |
| 83  | H31 | ha | E | -0.4580 | -5.0240 | -0.6910 | 0.077201  |
| 84  | C63 | ca | M | -1.0570 | -5.6870 | -2.6250 | 0.170479  |
| 85  | O16 | os | E | -0.0010 | -6.5630 | -2.7380 | -0.295814 |
| 86  | C59 | ca | M | -1.7870 | -5.3340 | -3.7420 | -0.166592 |
| 87  | H33 | ha | E | -1.5690 | -5.8270 | -4.6860 | 0.155458  |
| 88  | C62 | ca | M | -2.6680 | -4.2930 | -3.7170 | 0.170479  |
| 89  | O15 | os | M | -3.2710 | -3.9870 | -4.9160 | -0.295814 |
| 90  | C77 | ca | M | -4.0610 | -2.9060 | -5.1440 | 0.129911  |
| 91  | C74 | ca | S | -3.4630 | -1.7490 | -5.6080 | -0.125196 |
| 92  | H37 | ha | E | -2.3900 | -1.5760 | -5.6390 | 0.161643  |
| 93  | C73 | ca | M | -5.3960 | -3.1620 | -5.3070 | -0.070243 |
| 94  | H39 | ha | E | -5.8020 | -4.1500 | -5.1040 | 0.152216  |
| 95  | C76 | ca | M | -6.2480 | -2.1320 | -5.6650 | -0.271146 |
| 96  | H78 | ha | E | -7.7260 | -2.3950 | -5.6970 | 0.175048  |
| 97  | C75 | ca | M | -5.6930 | -0.8190 | -5.9550 | -0.070243 |
| 98  | H38 | ha | E | -6.2600 | 0.0840  | -6.1660 | 0.152216  |
| 99  | C65 | ca | M | -4.3320 | -0.6840 | -5.8620 | 0.129911  |
| 100 | O13 | os | M | -3.8470 | 0.5350  | -6.3550 | -0.295814 |
| 101 | C57 | ca | M | -2.9710 | 1.3190  | -5.6770 | 0.170479  |
| 102 | C54 | ca | M | -1.8770 | 1.9370  | -6.2420 | -0.166592 |
| 103 | H30 | ha | E | -1.5790 | 1.6560  | -7.2490 | 0.155458  |
| 104 | C58 | ca | M | -1.1840 | 2.8990  | -5.5540 | 0.170479  |
| 105 | O14 | os | M | -0.2710 | 3.6030  | -6.3370 | -0.295814 |
| 106 | C71 | ca | M | 0.4830  | 4.5680  | -5.7770 | 0.129911  |
| 107 | C70 | ca | S | 1.8070  | 4.3690  | -5.3040 | -0.125196 |
| 108 | H35 | ha | E | 2.2100  | 3.3690  | -5.4340 | 0.161643  |
| 109 | C68 | ca | M | -0.0980 | 5.8230  | -5.7250 | -0.070243 |
| 110 | H36 | ha | E | -1.1120 | 5.9550  | -6.0950 | 0.152216  |
| 111 | C72 | ca | M | 0.6450  | 6.9110  | -5.2020 | -0.271146 |
| 112 | H91 | ha | E | 0.0390  | 8.2950  | -5.3010 | 0.175048  |
| 113 | C69 | ca | M | 1.9590  | 6.6470  | -4.7050 | -0.070243 |
| 114 | H34 | ha | E | 2.5290  | 7.4240  | -4.2020 | 0.152216  |
| 115 | C64 | ca | M | 2.5180  | 5.3940  | -4.7170 | 0.129911  |
| 116 | O11 | os | M | 3.8140  | 5.1790  | -4.2690 | -0.295814 |
| 117 | C52 | ca | M | 4.1400  | 4.3350  | -3.2140 | 0.170479  |
| 118 | C49 | ca | M | 5.3730  | 3.6990  | -3.1920 | -0.166592 |
| 119 | H27 | ha | E | 5.9960  | 3.9250  | -4.0530 | 0.155458  |
| 120 | C53 | ca | M | 5.8060  | 2.9660  | -2.1720 | 0.170479  |
| 121 | O12 | os | M | 6.9260  | 2.1980  | -2.4430 | -0.295814 |
| 122 | C89 | ca | M | 7.1340  | 1.1040  | -1.6430 | 0.129911  |
| 123 | C86 | ca | S | 6.6520  | -0.1000 | -2.0110 | -0.125196 |
| 124 | H43 | ha | E | 6.1020  | -0.1680 | -2.9460 | 0.161643  |
| 125 | C85 | ca | M | 8.0540  | 1.1990  | -0.5600 | -0.070243 |
| 126 | H45 | ha | E | 8.4490  | 2.1800  | -0.3090 | 0.152216  |
| 127 | C88 | ca | M | 8.3250  | 0.1190  | 0.2670  | -0.271146 |
| 128 | H90 | ha | E | 8.9880  | 0.2140  | 1.6550  | 0.175048  |
| 129 | C87 | ca | M | 7.7270  | -1.0940 | -0.1070 | -0.070243 |
| 130 | H44 | ha | E | 7.8830  | -1.9790 | 0.5050  | 0.152216  |
| 131 | C67 | ca | M | 6.8860  | -1.2180 | -1.1970 | 0.129911  |
| 132 | O10 | os | M | 6.3190  | -2.4960 | -1.3660 | -0.295814 |
| 133 | C48 | ca | M | 5.4160  | -3.0580 | -0.5800 | 0.170479  |

|     |     |    |   |         |         |         |           |
|-----|-----|----|---|---------|---------|---------|-----------|
| 134 | C44 | ca | M | 5.1650  | -4.3950 | -0.9060 | -0.166592 |
| 135 | H24 | ha | E | 5.6610  | -4.9270 | -1.7140 | 0.155458  |
| 136 | C47 | ca | M | 4.2660  | -5.1190 | -0.1630 | 0.170479  |
| 137 | O9  | os | M | 4.1460  | -6.4310 | -0.3410 | -0.295814 |
| 138 | C83 | ca | M | 2.9300  | -6.9620 | -0.4970 | 0.129911  |
| 139 | C79 | ca | M | 2.3990  | -7.8210 | 0.3850  | -0.070243 |
| 140 | H42 | ha | E | 3.0780  | -8.2120 | 1.1390  | 0.152216  |
| 141 | C82 | ca | M | 1.1080  | -8.2640 | 0.3810  | -0.271146 |
| 142 | H84 | ha | E | 0.6290  | -9.2780 | 1.4400  | 0.175048  |
| 143 | C81 | ca | M | 0.2650  | -7.7360 | -0.6370 | -0.070243 |
| 144 | H41 | ha | E | -0.7330 | -8.1450 | -0.7710 | 0.152216  |
| 145 | C66 | ca | M | 0.7510  | -6.9350 | -1.6650 | 0.129911  |
| 146 | C80 | ca | M | 2.0660  | -6.4710 | -1.4940 | -0.125196 |
| 147 | H40 | ha | E | 2.3850  | -5.6980 | -2.1880 | 0.161643  |

LOOP

|     |     |
|-----|-----|
| C58 | C55 |
| C57 | C56 |
| C14 | O3  |
| C6  | C3  |
| C39 | O2  |
| C29 | C32 |
| C28 | C31 |
| C16 | C15 |
| C53 | C50 |
| C52 | C51 |
| C22 | O5  |
| C24 | C23 |
| C48 | C45 |
| C47 | C46 |
| C30 | O7  |
| C62 | C61 |
| C66 | O16 |
| C65 | C74 |
| C64 | C70 |
| C67 | C86 |
| C80 | C83 |

IMPROPER

|     |     |     |     |
|-----|-----|-----|-----|
| C58 | C42 | C55 | H28 |
| C9  | C55 | C42 | C56 |
| C57 | C42 | C56 | H29 |
| C1  | C6  | C3  | O1  |
| C3  | C4  | C1  | H1  |
| C1  | C5  | C4  | O2  |
| C7  | C4  | C5  | C2  |
| C7  | C29 | C32 | C31 |
| C28 | C32 | C31 | H56 |
| C5  | C6  | C2  | H2  |
| C8  | C3  | C6  | C2  |
| C8  | C15 | C10 | C14 |
| C10 | C16 | C15 | H5  |
| C10 | C17 | C14 | O3  |
| C14 | C13 | C17 | H6  |
| C17 | C16 | C13 | O4  |
| C34 | C50 | C41 | C51 |
| C53 | C41 | C50 | H25 |
| C52 | C41 | C51 | H26 |
| C18 | C15 | C16 | C13 |
| C18 | C23 | C19 | C22 |
| C19 | C24 | C23 | H8  |
| C19 | C25 | C22 | O5  |
| C22 | C21 | C25 | H9  |
| C25 | C24 | C21 | O6  |
| C38 | C45 | C40 | C46 |
| C48 | C40 | C45 | H22 |
| C47 | C40 | C46 | H23 |
| C26 | C23 | C24 | C21 |
| C26 | C30 | C28 | C31 |
| C28 | C33 | C30 | O7  |
| C30 | C29 | C33 | H11 |



|     |     |     |     |
|-----|-----|-----|-----|
| C33 | C32 | C29 | O8  |
| C39 | C61 | C43 | C60 |
| C43 | C62 | C61 | H32 |
| C43 | C63 | C60 | H31 |
| C60 | C59 | C63 | O16 |
| C63 | C62 | C59 | H33 |
| C61 | C59 | C62 | O15 |
| C74 | C73 | C77 | O15 |
| C77 | C65 | C74 | H37 |
| C77 | C76 | C73 | H39 |
| H78 | C73 | C76 | C75 |
| C76 | C65 | C75 | H38 |
| C74 | C75 | C65 | O13 |
| C54 | C56 | C57 | O13 |
| C57 | C58 | C54 | H30 |
| C54 | C55 | C58 | O14 |
| C70 | C68 | C71 | O14 |
| C71 | C64 | C70 | H35 |
| C71 | C72 | C68 | H36 |
| H91 | C68 | C72 | C69 |
| C72 | C64 | C69 | H34 |
| C70 | C69 | C64 | O11 |
| C49 | C51 | C52 | O11 |
| C52 | C53 | C49 | H27 |
| C49 | C50 | C53 | O12 |
| C86 | C85 | C89 | O12 |
| C89 | C67 | C86 | H43 |
| C89 | C88 | C85 | H45 |
| H90 | C85 | C88 | C87 |
| C88 | C67 | C87 | H44 |
| C86 | C87 | C67 | O10 |
| C44 | C45 | C48 | O10 |
| C48 | C47 | C44 | H24 |
| C44 | C46 | C47 | O9  |
| C79 | C80 | C83 | O9  |
| C83 | C82 | C79 | H42 |
| H84 | C79 | C82 | C81 |
| C82 | C66 | C81 | H41 |
| C81 | C80 | C66 | O16 |
| C83 | C66 | C80 | H40 |

DONE  
STOP

nom.in

0 0 2

mno.dat

MNO, OctaAcid, Methylated, neutral without carboxylate groups, RESP charges, UR  
26/11-15

mno.dat

MNO INT 1

CHANGE OMIT DU BEG

|         |      |    |   |        |        |        |           |
|---------|------|----|---|--------|--------|--------|-----------|
| 0.00000 |      |    |   |        |        |        |           |
| 1       | DUMM | DU | M | 0.0000 | 0.0000 | .0000  | .0000     |
| 2       | DUMM | DU | M | 0.0000 | 1.0000 | .0000  | .0000     |
| 3       | DUMM | DU | M | 1.0000 | 1.0000 | .0000  | .0000     |
| 4       | C55  | ca | M | 4.846  | 1.737  | 1.522  | -0.112539 |
| 5       | H28  | ha | E | 4.590  | 2.661  | 0.997  | 0.123080  |
| 6       | C42  | ca | M | 4.766  | 0.494  | 0.860  | -0.112316 |
| 7       | C56  | ca | S | 5.121  | -0.702 | 1.513  | -0.112539 |
| 8       | H29  | ha | E | 5.072  | -1.658 | 0.983  | 0.123080  |
| 9       | C9   | c3 | M | 4.131  | 0.424  | -0.526 | 0.122656  |
| 10      | O3   | os | E | 4.383  | 1.627  | -1.253 | -0.209810 |
| 11      | H19  | h2 | E | 3.033  | 0.315  | -0.400 | 0.132962  |
| 12      | O1   | os | M | 4.614  | -0.705 | -1.247 | -0.209810 |
| 13      | C3   | ca | M | 3.635  | -1.398 | -1.964 | 0.027094  |
| 14      | C1   | ca | M | 3.150  | -2.566 | -1.376 | -0.070050 |
| 15      | H1   | ha | E | 3.535  | -2.887 | -0.404 | 0.113670  |
| 16      | C4   | ca | M | 2.127  | -3.288 | -1.991 | 0.027094  |
| 17      | O2   | os | E | 1.656  | -4.404 | -1.295 | -0.209810 |
| 18      | C5   | ca | M | 1.576  | -2.882 | -3.229 | 0.031393  |
| 19      | C7   | c3 | 3 | 0.393  | -3.684 | -3.805 | -0.005156 |
| 20      | H12  | hc | E | 0.391  | -3.855 | -4.892 | 0.066884  |
| 21      | C32  | ca | S | -0.916 | -3.124 | -3.215 | 0.031393  |
| 22      | C31  | ca | S | -1.694 | -2.095 | -3.796 | -0.268186 |
| 23      | H56  | ha | E | -1.371 | -1.684 | -4.760 | 0.163321  |
| 24      | H4   | hc | E | 0.490  | -4.685 | -3.346 | 0.066884  |
| 25      | C2   | ca | M | 2.115  | -1.708 | -3.809 | -0.268186 |
| 26      | H2   | ha | E | 1.711  | -1.370 | -4.771 | 0.163321  |
| 27      | C6   | ca | M | 3.137  | -0.937 | -3.206 | 0.031393  |
| 28      | C8   | c3 | M | 3.706  | 0.376  | -3.778 | -0.005156 |
| 29      | H13  | hc | E | 3.896  | 0.382  | -4.862 | 0.066884  |
| 30      | H3   | hc | E | 4.699  | 0.472  | -3.301 | 0.066884  |
| 31      | C10  | ca | M | 2.896  | 1.558  | -3.213 | 0.031393  |
| 32      | C15  | ca | S | 1.731  | 2.099  | -3.808 | -0.268186 |
| 33      | H5   | ha | E | 1.403  | 1.695  | -4.773 | 0.163321  |
| 34      | C14  | ca | M | 3.286  | 2.104  | -1.967 | 0.027094  |
| 35      | C17  | ca | M | 2.561  | 3.135  | -1.367 | -0.070050 |
| 36      | H6   | ha | E | 2.874  | 3.524  | -0.393 | 0.113670  |
| 37      | C13  | ca | M | 1.406  | 3.629  | -1.973 | 0.027094  |
| 38      | O4   | os | S | 0.723  | 4.625  | -1.270 | -0.209810 |
| 39      | C34  | c3 | 3 | -0.424 | 4.173  | -0.560 | 0.122656  |
| 40      | C41  | ca | B | -0.515 | 4.855  | 0.803  | -0.112316 |
| 41      | C50  | ca | S | -1.778 | 5.013  | 1.408  | -0.112539 |
| 42      | H25  | ha | E | -2.690 | 4.776  | 0.853  | 0.123080  |
| 43      | C51  | ca | S | 0.670  | 5.179  | 1.494  | -0.112539 |
| 44      | H26  | ha | E | 1.642  | 5.063  | 1.007  | 0.123080  |
| 45      | O5   | os | E | -1.609 | 4.414  | -1.309 | -0.209810 |
| 46      | H18  | h2 | E | -0.327 | 3.079  | -0.398 | 0.122656  |
| 47      | C16  | ca | M | 0.954  | 3.125  | -3.217 | 0.031393  |
| 48      | C18  | c3 | M | -0.354 | 3.690  | -3.806 | -0.005156 |
| 49      | H14  | hc | E | -0.352 | 3.868  | -4.892 | 0.066884  |
| 50      | H7   | hc | E | -0.450 | 4.689  | -3.342 | 0.066884  |
| 51      | C19  | ca | M | -1.538 | 2.886  | -3.234 | 0.031393  |
| 52      | C23  | ca | S | -2.078 | 1.710  | -3.808 | -0.268186 |
| 53      | H8   | ha | E | -1.679 | 1.368  | -4.770 | 0.163321  |
| 54      | C22  | ca | M | -2.085 | 3.295  | -1.997 | 0.027094  |
| 55      | C25  | ca | M | -3.101 | 2.574  | -1.370 | -0.070050 |
| 56      | H9   | ha | E | -3.482 | 2.900  | -0.397 | 0.113670  |
| 57      | C21  | ca | M | -3.585 | 1.403  | -1.951 | 0.027094  |
| 58      | O6   | os | S | -4.555 | 0.709  | -1.225 | -0.209810 |
| 59      | C38  | c3 | 3 | -4.059 | -0.415 | -0.503 | 0.122656  |
| 60      | C40  | ca | B | -4.680 | -0.464 | 0.894  | -0.112316 |
| 61      | C45  | ca | S | -5.069 | 0.741  | 1.514  | -0.112539 |
| 62      | H22  | ha | E | -5.047 | 1.681  | 0.956  | 0.123080  |
| 63      | C46  | ca | S | -4.726 | -1.690 | 1.589  | -0.112539 |

|     |     |    |   |        |        |        |           |
|-----|-----|----|---|--------|--------|--------|-----------|
| 64  | H23 | ha | E | -4.440 | -2.621 | 1.089  | 0.123080  |
| 65  | O7  | os | E | -4.321 | -1.622 | -1.208 | -0.209810 |
| 66  | H20 | h2 | E | -2.959 | -0.301 | -0.398 | 0.132962  |
| 67  | C24 | ca | M | -3.094 | 0.939  | -3.194 | 0.031393  |
| 68  | C26 | c3 | M | -3.668 | -0.376 | -3.754 | -0.005156 |
| 69  | H15 | hc | E | -3.869 | -0.382 | -4.835 | 0.066884  |
| 70  | H10 | hc | E | -4.658 | -0.467 | -3.269 | 0.066884  |
| 71  | C28 | ca | M | -2.854 | -1.555 | -3.191 | 0.031393  |
| 72  | C30 | ca | M | -3.234 | -2.105 | -1.944 | 0.027094  |
| 73  | C33 | ca | M | -2.515 | -3.146 | -1.358 | -0.070050 |
| 74  | H11 | ha | E | -2.826 | -3.546 | -0.388 | 0.113670  |
| 75  | C29 | ca | M | -1.366 | -3.638 | -1.977 | 0.027094  |
| 76  | O8  | os | M | -0.675 | -4.638 | -1.289 | -0.209810 |
| 77  | C39 | c3 | M | 0.458  | -4.170 | -0.562 | 0.122656  |
| 78  | H21 | h2 | E | 0.351  | -3.075 | -0.420 | 0.132962  |
| 79  | C43 | ca | M | 0.523  | -4.837 | 0.809  | -0.112316 |
| 80  | C61 | ca | S | 1.765  | -4.935 | 1.467  | -0.112539 |
| 81  | H32 | ha | E | 2.688  | -4.653 | 0.952  | 0.123080  |
| 82  | C60 | ca | M | -0.672 | -5.216 | 1.454  | -0.112539 |
| 83  | H31 | ha | E | -1.628 | -5.153 | 0.926  | 0.123080  |
| 84  | C63 | ca | M | -0.614 | -5.681 | 2.779  | 0.177924  |
| 85  | O16 | os | E | -1.700 | -6.139 | 3.504  | -0.281548 |
| 86  | C59 | ca | M | 0.615  | -5.768 | 3.448  | -0.179464 |
| 87  | H33 | ha | E | 0.649  | -6.103 | 4.488  | 0.146982  |
| 88  | C62 | ca | M | 1.802  | -5.397 | 2.795  | 0.177924  |
| 89  | O15 | os | M | 2.945  | -5.578 | 3.539  | -0.281548 |
| 90  | C77 | ca | M | 4.186  | -4.960 | 3.328  | 0.087409  |
| 91  | C74 | ca | S | 4.322  | -3.547 | 3.345  | 0.150694  |
| 92  | C3M | c3 | 3 | 3.139  | -2.617 | 3.462  | -0.181608 |
| 93  | H63 | hc | E | 2.277  | -3.083 | 3.968  | 0.064532  |
| 94  | H64 | hc | E | 2.776  | -2.291 | 2.465  | 0.064532  |
| 95  | H65 | hc | E | 3.374  | -1.697 | 4.027  | 0.064532  |
| 96  | C73 | ca | M | 5.288  | -5.832 | 3.345  | -0.145352 |
| 97  | H39 | ha | E | 5.132  | -6.916 | 3.382  | 0.158522  |
| 98  | C76 | ca | M | 6.603  | -5.337 | 3.389  | -0.244274 |
| 99  | H78 | ha | E | 7.462  | -6.014 | 3.504  | 0.193636  |
| 100 | C75 | ca | M | 6.771  | -3.942 | 3.373  | -0.145352 |
| 101 | H38 | ha | E | 7.786  | -3.533 | 3.432  | 0.158522  |
| 102 | C65 | ca | M | 5.662  | -3.078 | 3.355  | 0.087409  |
| 103 | O13 | os | M | 5.960  | -1.731 | 3.596  | -0.281548 |
| 104 | C57 | ca | M | 5.536  | -0.650 | 2.856  | 0.177924  |
| 105 | C54 | ca | M | 5.596  | 0.578  | 3.531  | -0.179464 |
| 106 | H30 | ha | E | 5.889  | 0.607  | 4.584  | 0.146982  |
| 107 | C58 | ca | M | 5.260  | 1.766  | 2.865  | 0.177924  |
| 108 | O14 | os | M | 5.438  | 2.909  | 3.620  | -0.281548 |
| 109 | C71 | ca | M | 4.853  | 4.160  | 3.414  | 0.087409  |
| 110 | C70 | ca | S | 3.444  | 4.333  | 3.392  | 0.150694  |
| 111 | C4M | c3 | 3 | 2.479  | 3.174  | 3.463  | -0.181608 |
| 112 | H66 | hc | E | 2.874  | 2.294  | 4.003  | 0.064532  |
| 113 | H67 | hc | E | 2.196  | 2.823  | 2.451  | 0.064532  |
| 114 | H68 | hc | E | 1.543  | 3.476  | 3.966  | 0.064532  |
| 115 | C68 | ca | M | 5.743  | 5.248  | 3.476  | -0.145352 |
| 116 | H36 | ha | E | 6.822  | 5.070  | 3.545  | 0.158522  |
| 117 | C72 | ca | M | 5.274  | 6.571  | 3.528  | -0.244274 |
| 118 | H91 | ha | E | 5.962  | 7.415  | 3.683  | 0.193636  |
| 119 | C69 | ca | M | 3.884  | 6.772  | 3.469  | -0.145352 |
| 120 | H34 | ha | E | 3.497  | 7.795  | 3.533  | 0.158522  |
| 121 | C64 | ca | M | 3.001  | 5.682  | 3.405  | 0.087409  |
| 122 | O11 | os | M | 1.649  | 6.006  | 3.608  | -0.281548 |
| 123 | C52 | ca | M | 0.584  | 5.641  | 2.820  | 0.177924  |
| 124 | C49 | ca | M | -0.671 | 5.790  | 3.436  | -0.179464 |
| 125 | H27 | ha | E | -0.730 | 6.133  | 4.473  | 0.146982  |
| 126 | C53 | ca | M | -1.845 | 5.480  | 2.732  | 0.177924  |
| 127 | O12 | os | M | -3.017 | 5.718  | 3.426  | -0.281548 |
| 128 | C89 | ca | M | -4.243 | 5.073  | 3.223  | 0.087409  |
| 129 | C86 | ca | S | -4.358 | 3.660  | 3.298  | 0.150694  |
| 130 | C1M | c3 | 3 | -3.155 | 2.771  | 3.498  | -0.181608 |
| 131 | H57 | hc | E | -2.380 | 3.282  | 4.098  | 0.064532  |
| 132 | H58 | hc | E | -2.683 | 2.491  | 2.538  | 0.064532  |
| 133 | H59 | hc | E | -3.432 | 1.830  | 4.007  | 0.064532  |
| 134 | C85 | ca | M | -5.366 | 5.916  | 3.187  | -0.145352 |
| 135 | H45 | ha | E | -5.241 | 7.004  | 3.186  | 0.158522  |

|     |     |    |   |        |        |       |           |
|-----|-----|----|---|--------|--------|-------|-----------|
| 136 | C88 | ca | M | -6.668 | 5.388  | 3.227 | -0.244274 |
| 137 | H90 | ha | E | -7.544 | 6.048  | 3.312 | 0.193636  |
| 138 | C87 | ca | M | -6.809 | 3.989  | 3.252 | -0.145352 |
| 139 | H44 | ha | E | -7.816 | 3.563  | 3.303 | 0.158522  |
| 140 | C67 | ca | M | -5.682 | 3.150  | 3.289 | 0.087409  |
| 141 | O10 | os | M | -5.942 | 1.803  | 3.570 | -0.281548 |
| 142 | C48 | ca | M | -5.492 | 0.710  | 2.854 | 0.177924  |
| 143 | C44 | ca | M | -5.527 | -0.502 | 3.560 | -0.179464 |
| 144 | H24 | ha | E | -5.846 | -0.515 | 4.607 | 0.146982  |
| 145 | C47 | ca | M | -5.152 | -1.701 | 2.930 | 0.177924  |
| 146 | O9  | os | M | -5.281 | -2.819 | 3.724 | -0.281548 |
| 147 | C83 | ca | M | -4.791 | -4.106 | 3.447 | 0.087409  |
| 148 | C79 | ca | M | -5.749 | -5.133 | 3.439 | -0.145352 |
| 149 | H42 | ha | E | -6.816 | -4.898 | 3.513 | 0.158522  |
| 150 | C82 | ca | M | -5.356 | -6.483 | 3.417 | -0.244274 |
| 151 | H84 | ha | E | -6.094 | -7.291 | 3.532 | 0.193636  |
| 152 | C81 | ca | M | -3.980 | -6.763 | 3.341 | -0.145352 |
| 153 | H41 | ha | E | -3.658 | -7.810 | 3.335 | 0.158522  |
| 154 | C66 | ca | M | -3.027 | -5.729 | 3.350 | 0.087409  |
| 155 | C80 | ca | M | -3.396 | -4.361 | 3.438 | 0.150694  |
| 156 | C2M | c3 | 3 | -2.380 | -3.265 | 3.640 | -0.181608 |
| 157 | H60 | hc | E | -2.828 | -2.402 | 4.161 | 0.064532  |
| 158 | H61 | hc | E | -1.977 | -2.895 | 2.681 | 0.064532  |
| 159 | H62 | hc | E | -1.505 | -3.596 | 4.224 | 0.064532  |

#### LOOP

C58 C55  
 C57 C56  
 C14 O3  
 C6 C3  
 C39 O2  
 C29 C32  
 C28 C31  
 C16 C15  
 C53 C50  
 C52 C51  
 C22 O5  
 C24 C23  
 C48 C45  
 C47 C46  
 C30 O7  
 C62 C61  
 C66 O16  
 C65 C74  
 C64 C70  
 C67 C86  
 C80 C83

#### IMPROPER

C58 C42 C55 H28  
 C9 C55 C42 C56  
 C57 C42 C56 H29  
 C1 C6 C3 O1  
 C3 C4 C1 H1  
 C1 C5 C4 O2  
 C7 C4 C5 C2  
 C7 C29 C32 C31  
 C28 C32 C31 H56  
 C5 C6 C2 H2  
 C8 C3 C6 C2  
 C8 C15 C10 C14  
 C10 C16 C15 H5  
 C10 C17 C14 O3  
 C14 C13 C17 H6  
 C17 C16 C13 O4  
 C34 C50 C41 C51  
 C53 C41 C50 H25  
 C52 C41 C51 H26  
 C18 C15 C16 C13  
 C18 C23 C19 C22  
 C19 C24 C23 H8

|     |     |     |     |
|-----|-----|-----|-----|
| C19 | C25 | C22 | O5  |
| C22 | C21 | C25 | H9  |
| C25 | C24 | C21 | O6  |
| C38 | C45 | C40 | C46 |
| C48 | C40 | C45 | H22 |
| C47 | C40 | C46 | H23 |
| C26 | C23 | C24 | C21 |
| C26 | C30 | C28 | C31 |
| C28 | C33 | C30 | O7  |
| C30 | C29 | C33 | H11 |
| C33 | C32 | C29 | O8  |
| C39 | C61 | C43 | C60 |
| C43 | C62 | C61 | H32 |
| C43 | C63 | C60 | H31 |
| C60 | C59 | C63 | O16 |
| C63 | C62 | C59 | H33 |
| C61 | C59 | C62 | O15 |
| C74 | C73 | C77 | O15 |
| C77 | C65 | C74 | C3M |
| C77 | C76 | C73 | H39 |
| H78 | C73 | C76 | C75 |
| C76 | C65 | C75 | H38 |
| C74 | C75 | C65 | O13 |
| C54 | C56 | C57 | O13 |
| C57 | C58 | C54 | H30 |
| C54 | C55 | C58 | O14 |
| C70 | C68 | C71 | O14 |
| C71 | C64 | C70 | C4M |
| C71 | C72 | C68 | H36 |
| H91 | C68 | C72 | C69 |
| C72 | C64 | C69 | H34 |
| C70 | C69 | C64 | O11 |
| C49 | C51 | C52 | O11 |
| C52 | C53 | C49 | H27 |
| C49 | C50 | C53 | O12 |
| C86 | C85 | C89 | O12 |
| C89 | C67 | C86 | C1M |
| C89 | C88 | C85 | H45 |
| H90 | C85 | C88 | C87 |
| C88 | C67 | C87 | H44 |
| C86 | C87 | C67 | O10 |
| C44 | C45 | C48 | O10 |
| C48 | C47 | C44 | H24 |
| C44 | C46 | C47 | O9  |
| C79 | C80 | C83 | O9  |
| C83 | C82 | C79 | H42 |
| H84 | C79 | C82 | C81 |
| C82 | C66 | C81 | H41 |
| C81 | C80 | C66 | O16 |
| C83 | C66 | C80 | C2M |

DONE  
STOP

G1.in

0 0 2

This is a remark line

molecule.res

G1 INT 0

CORRECT OMIT DU BEG

0.0000

|    |      |    |   |    |    |    |       |         |          |           |
|----|------|----|---|----|----|----|-------|---------|----------|-----------|
| 1  | DUMM | DU | M | 0  | -1 | -2 | 0.000 | .0      | .0       | .00000    |
| 2  | DUMM | DU | M | 1  | 0  | -1 | 1.449 | .0      | .0       | .00000    |
| 3  | DUMM | DU | M | 2  | 1  | 0  | 1.523 | 111.21  | .0       | .00000    |
| 4  | C1   | c1 | M | 3  | 2  | 1  | 1.540 | 111.208 | -180.000 | -0.564113 |
| 5  | H1   | ha | E | 4  | 3  | 2  | 1.056 | 22.755  | 80.561   | 0.309304  |
| 6  | C2   | c1 | M | 4  | 3  | 2  | 1.198 | 157.643 | -99.090  | 0.021138  |
| 7  | C3   | c3 | M | 6  | 4  | 3  | 1.434 | 179.242 | 66.974   | 0.036302  |
| 8  | H2   | hc | E | 7  | 6  | 4  | 1.125 | 109.097 | -64.850  | 0.046452  |
| 9  | H3   | hc | E | 7  | 6  | 4  | 1.135 | 110.620 | 52.399   | 0.046452  |
| 10 | C4   | c3 | M | 7  | 6  | 4  | 1.521 | 112.863 | 173.241  | 0.087275  |
| 11 | H4   | hc | E | 10 | 7  | 6  | 1.121 | 109.459 | -56.280  | -0.019439 |
| 12 | H5   | hc | E | 10 | 7  | 6  | 1.122 | 109.481 | 61.285   | -0.019439 |
| 13 | C5   | c3 | M | 10 | 7  | 6  | 1.511 | 111.014 | -177.109 | -0.081234 |
| 14 | H6   | hc | E | 13 | 10 | 7  | 1.120 | 109.068 | -169.028 | -0.044274 |
| 15 | H7   | hc | E | 13 | 10 | 7  | 1.119 | 109.964 | -50.536  | -0.044274 |
| 16 | C6   | c  | M | 13 | 10 | 7  | 1.539 | 112.459 | 70.352   | 0.879953  |
| 17 | O2   | o  | E | 16 | 13 | 10 | 1.264 | 117.846 | 114.011  | -0.827051 |
| 18 | O1   | o  | M | 16 | 13 | 10 | 1.267 | 118.511 | -66.945  | -0.827051 |

LOOP

IMPROPER

C5 O2 C6 O1

DONE

STOP

G2.in

0 0 2

This is a remark line

molecule.res

G2 INT 0

CORRECT OMIT DU BEG

0.0000

|    |      |    |   |    |    |    |       |         |          |           |
|----|------|----|---|----|----|----|-------|---------|----------|-----------|
| 1  | DUMM | DU | M | 0  | -1 | -2 | 0.000 | .0      | .0       | .00000    |
| 2  | DUMM | DU | M | 1  | 0  | -1 | 1.449 | .0      | .0       | .00000    |
| 3  | DUMM | DU | M | 2  | 1  | 0  | 1.523 | 111.21  | .0       | .00000    |
| 4  | C1   | ca | M | 3  | 2  | 1  | 1.540 | 111.208 | -180.000 | -0.179112 |
| 5  | H1   | ha | E | 4  | 3  | 2  | 1.102 | 58.501  | -180.000 | 0.144645  |
| 6  | C2   | ca | M | 4  | 3  | 2  | 1.391 | 179.712 | 179.993  | -0.160745 |
| 7  | H2   | ha | E | 6  | 4  | 3  | 1.099 | 120.376 | 0.007    | 0.144792  |
| 8  | C3   | ca | M | 6  | 4  | 3  | 1.403 | 119.821 | -179.993 | -0.036845 |
| 9  | C7   | cg | S | 8  | 6  | 4  | 1.419 | 120.109 | 180.000  | 0.375755  |
| 10 | N1   | nl | E | 9  | 8  | 6  | 1.165 | 180.000 | 90.000   | -0.534385 |
| 11 | C4   | ca | M | 8  | 6  | 4  | 1.403 | 119.781 | 0.000    | -0.160745 |
| 12 | H3   | ha | E | 11 | 8  | 6  | 1.099 | 119.803 | 180.000  | 0.144792  |
| 13 | C5   | ca | M | 11 | 8  | 6  | 1.391 | 119.821 | 0.000    | -0.179112 |
| 14 | H4   | ha | E | 13 | 11 | 8  | 1.102 | 121.210 | 180.000  | 0.144645  |
| 15 | C6   | ca | M | 13 | 11 | 8  | 1.399 | 120.683 | 0.000    | 0.084991  |
| 16 | C8   | c  | M | 15 | 13 | 11 | 1.525 | 120.395 | 180.000  | 0.756800  |
| 17 | O2   | o  | E | 16 | 15 | 13 | 1.262 | 117.661 | 180.000  | -0.772737 |
| 18 | O1   | o  | M | 16 | 15 | 13 | 1.262 | 117.661 | -0.000   | -0.772737 |

LOOP

C6 C1

IMPROPER

|    |    |    |    |
|----|----|----|----|
| C6 | C2 | C1 | H1 |
| C1 | C3 | C2 | H2 |
| C4 | C2 | C3 | C7 |
| C5 | C3 | C4 | H3 |
| C4 | C6 | C5 | H4 |
| C8 | C5 | C6 | C1 |
| C6 | O2 | C8 | O1 |

DONE

STOP

G3.in

0 0 2

This is a remark line

molecule.res

G3 INT 0

CORRECT OMIT DU BEG

0.0000

|    |      |    |   |    |    |    |       |         |          |           |
|----|------|----|---|----|----|----|-------|---------|----------|-----------|
| 1  | DUMM | DU | M | 0  | -1 | -2 | 0.000 | .0      | .0       | .00000    |
| 2  | DUMM | DU | M | 1  | 0  | -1 | 1.449 | .0      | .0       | .00000    |
| 3  | DUMM | DU | M | 2  | 1  | 0  | 1.523 | 111.21  | .0       | .00000    |
| 4  | C1   | c3 | M | 3  | 2  | 1  | 1.540 | 111.208 | -180.000 | -0.350978 |
| 5  | H1   | hc | E | 4  | 3  | 2  | 1.116 | 90.975  | -54.188  | 0.084387  |
| 6  | H2   | hc | E | 4  | 3  | 2  | 1.117 | 90.975  | 54.218   | 0.084387  |
| 7  | H13  | hc | E | 4  | 3  | 2  | 1.118 | 145.755 | -180.000 | 0.084387  |
| 8  | C2   | c3 | M | 4  | 3  | 2  | 1.507 | 35.684  | -180.000 | 0.261609  |
| 9  | H3   | hc | E | 8  | 4  | 3  | 1.122 | 109.682 | -121.277 | -0.033521 |
| 10 | H4   | hc | E | 8  | 4  | 3  | 1.122 | 109.661 | 121.240  | -0.033521 |
| 11 | C3   | c3 | M | 8  | 4  | 3  | 1.515 | 111.224 | 0.000    | -0.058263 |
| 12 | H5   | hc | E | 11 | 8  | 4  | 1.122 | 109.524 | 58.679   | 0.015459  |
| 13 | H6   | hc | E | 11 | 8  | 4  | 1.122 | 109.554 | -58.732  | 0.015459  |
| 14 | C4   | c3 | M | 11 | 8  | 4  | 1.515 | 110.983 | 180.000  | -0.105818 |
| 15 | H7   | hc | E | 14 | 11 | 8  | 1.122 | 109.529 | 58.764   | 0.027822  |
| 16 | H8   | hc | E | 14 | 11 | 8  | 1.122 | 109.494 | -58.829  | 0.027822  |
| 17 | C5   | c3 | M | 14 | 11 | 8  | 1.518 | 110.574 | 180.000  | 0.266561  |
| 18 | H9   | hc | E | 17 | 14 | 11 | 1.122 | 109.221 | 58.904   | -0.019084 |
| 19 | H10  | hc | E | 17 | 14 | 11 | 1.121 | 109.202 | -58.943  | -0.019084 |
| 20 | C6   | c3 | M | 17 | 14 | 11 | 1.523 | 108.861 | 180.000  | -0.289143 |
| 21 | H11  | hx | E | 20 | 17 | 14 | 1.128 | 109.253 | 59.347   | 0.152146  |
| 22 | H12  | hx | E | 20 | 17 | 14 | 1.129 | 109.239 | -59.374  | 0.152146  |
| 23 | N1   | n4 | M | 20 | 17 | 14 | 1.509 | 115.458 | 180.000  | 0.213768  |
| 24 | C8   | c3 | 3 | 23 | 20 | 17 | 1.496 | 108.258 | 180.000  | -0.452941 |
| 25 | H17  | hx | E | 24 | 23 | 20 | 1.122 | 109.358 | 60.041   | 0.209142  |
| 26 | H18  | hx | E | 24 | 23 | 20 | 1.123 | 109.396 | 180.000  | 0.209142  |
| 27 | H19  | hx | E | 24 | 23 | 20 | 1.122 | 109.386 | -60.008  | 0.209142  |
| 28 | C9   | c3 | 3 | 23 | 20 | 17 | 1.492 | 110.547 | 60.741   | -0.452941 |
| 29 | H20  | hx | E | 28 | 23 | 20 | 1.122 | 109.316 | 174.717  | 0.209142  |
| 30 | H21  | hx | E | 28 | 23 | 20 | 1.123 | 109.545 | -65.568  | 0.209142  |
| 31 | H22  | hx | E | 28 | 23 | 20 | 1.122 | 109.394 | 54.576   | 0.209142  |
| 32 | C7   | c3 | M | 23 | 20 | 17 | 1.492 | 110.569 | -60.689  | -0.452941 |
| 33 | H14  | hx | E | 32 | 23 | 20 | 1.122 | 109.342 | -54.598  | 0.209142  |
| 34 | H15  | hx | E | 32 | 23 | 20 | 1.122 | 109.563 | 65.505   | 0.209142  |
| 35 | H16  | hx | E | 32 | 23 | 20 | 1.123 | 109.342 | -174.629 | 0.209142  |

LOOP

IMPROPER

DONE

STOP



G4.in

0 0 2

g04.dat

G4 in SAMPL5 challenge, 2/12-15

g04.dat

G4 INT 1

CHANGE OMIT DU BEG

|         |      |    |   |        |        |        |           |
|---------|------|----|---|--------|--------|--------|-----------|
| 0.00000 |      |    |   |        |        |        |           |
| 1       | DUMM | DU | M | 0.0000 | 0.0000 | .0000  | .0000     |
| 2       | DUMM | DU | M | 0.0000 | 1.0000 | .0000  | .0000     |
| 3       | DUMM | DU | M | 1.0000 | 1.0000 | .0000  | .0000     |
| 4       | C4   | c3 | M | 22.150 | 18.674 | 22.919 | 0.062137  |
| 5       | H5   | hc | E | 21.352 | 18.242 | 23.527 | -0.089187 |
| 6       | H6   | hc | E | 23.014 | 18.009 | 22.981 | -0.089187 |
| 7       | C3   | c3 | M | 22.438 | 20.095 | 23.471 | 0.021407  |
| 8       | H4   | hc | E | 22.698 | 19.957 | 24.523 | 0.050315  |
| 9       | C1   | c3 | M | 21.249 | 21.039 | 23.369 | -0.196293 |
| 10      | H1   | hc | E | 20.313 | 20.796 | 23.876 | 0.042411  |
| 11      | H2   | hc | E | 21.511 | 21.958 | 23.898 | 0.042411  |
| 12      | C2   | c3 | M | 20.886 | 21.148 | 21.875 | 0.090325  |
| 13      | H3   | hc | E | 19.931 | 21.643 | 21.686 | 0.025680  |
| 14      | C5   | c3 | M | 20.560 | 19.733 | 21.343 | -0.549274 |
| 15      | H7   | hc | E | 20.026 | 19.676 | 20.393 | 0.101130  |
| 16      | H8   | hc | E | 19.925 | 19.338 | 22.139 | 0.101130  |
| 17      | C6   | c3 | M | 21.765 | 18.780 | 21.431 | 1.616433  |
| 18      | C11  | c  | B | 21.378 | 17.403 | 21.008 | -0.855190 |
| 19      | O1   | o  | E | 21.892 | 16.382 | 21.483 | -0.322036 |
| 20      | O2   | o  | E | 20.471 | 17.294 | 20.263 | -0.322036 |
| 21      | C7   | c3 | M | 22.846 | 19.485 | 20.603 | -0.252302 |
| 22      | H9   | hc | E | 23.762 | 18.891 | 20.586 | -0.039079 |
| 23      | H10  | hc | E | 22.595 | 19.549 | 19.542 | -0.039079 |
| 24      | C10  | c3 | M | 23.261 | 20.883 | 21.236 | 0.366020  |
| 25      | H14  | hc | E | 24.017 | 21.388 | 20.632 | -0.009658 |
| 26      | C8   | c3 | B | 22.117 | 21.907 | 21.386 | -0.371892 |
| 27      | H11  | hc | E | 22.320 | 22.721 | 22.085 | 0.066101  |
| 28      | H12  | hc | E | 21.906 | 22.607 | 20.574 | 0.066101  |
| 29      | C9   | c3 | M | 23.606 | 20.746 | 22.718 | -0.575757 |
| 30      | H13  | h1 | E | 24.010 | 21.713 | 23.029 | 0.227293  |
| 31      | BR1  | br | E | 25.133 | 19.607 | 23.199 | -0.167925 |

LOOP

C6 C4

C9 C3

C2 C8

IMPROPER

C6 O1 C11 O2

DONE

STOP

G5.in

0 0 2

This is a remark line

molecule.res

G5 INT 0

CORRECT OMIT DU BEG

0.0000

|    |      |    |   |    |    |    |       |         |          |           |
|----|------|----|---|----|----|----|-------|---------|----------|-----------|
| 1  | DUMM | DU | M | 0  | -1 | -2 | 0.000 | .0      | .0       | .00000    |
| 2  | DUMM | DU | M | 1  | 0  | -1 | 1.449 | .0      | .0       | .00000    |
| 3  | DUMM | DU | M | 2  | 1  | 0  | 1.523 | 111.21  | .0       | .00000    |
| 4  | C3   | ca | M | 3  | 2  | 1  | 1.540 | 111.208 | -180.000 | -0.249047 |
| 5  | H12  | ha | E | 4  | 3  | 2  | 1.101 | 68.865  | -8.004   | 0.162324  |
| 6  | C2   | ca | M | 4  | 3  | 2  | 1.394 | 148.580 | 104.744  | -0.111874 |
| 7  | H11  | ha | E | 6  | 4  | 3  | 1.101 | 119.891 | -97.124  | 0.157142  |
| 8  | C1   | ca | M | 6  | 4  | 3  | 1.396 | 120.044 | 83.762   | -0.124909 |
| 9  | H10  | ha | E | 8  | 6  | 4  | 1.101 | 119.989 | 179.407  | 0.155596  |
| 10 | C6   | ca | M | 8  | 6  | 4  | 1.394 | 119.911 | 0.107    | -0.111874 |
| 11 | H14  | ha | E | 10 | 8  | 6  | 1.102 | 119.987 | 178.900  | 0.157142  |
| 12 | C5   | ca | M | 10 | 8  | 6  | 1.394 | 120.162 | -0.188   | -0.249047 |
| 13 | H13  | ha | E | 12 | 10 | 8  | 1.101 | 119.580 | 178.095  | 0.162324  |
| 14 | C4   | ca | M | 12 | 10 | 8  | 1.400 | 120.161 | -0.172   | 0.214015  |
| 15 | C7   | c3 | M | 14 | 12 | 10 | 1.486 | 120.296 | 177.309  | -0.311862 |
| 16 | H15  | hc | E | 15 | 14 | 12 | 1.129 | 108.550 | -126.339 | 0.150923  |
| 17 | H16  | hc | E | 15 | 14 | 12 | 1.123 | 110.713 | -9.747   | 0.150923  |
| 18 | C8   | c3 | M | 15 | 14 | 12 | 1.524 | 114.461 | 116.202  | -0.184135 |
| 19 | H17  | hx | E | 18 | 15 | 14 | 1.129 | 109.257 | 51.432   | 0.168867  |
| 20 | H18  | hx | E | 18 | 15 | 14 | 1.130 | 107.999 | 169.737  | 0.168867  |
| 21 | N1   | n4 | M | 18 | 15 | 14 | 1.511 | 117.005 | -70.091  | 0.146884  |
| 22 | C10  | c3 | 3 | 21 | 18 | 15 | 1.494 | 110.713 | 77.548   | -0.440009 |
| 23 | H4   | hx | E | 22 | 21 | 18 | 1.125 | 109.327 | -57.828  | 0.207530  |
| 24 | H5   | hx | E | 22 | 21 | 18 | 1.122 | 109.261 | -178.010 | 0.207530  |
| 25 | H6   | hx | E | 22 | 21 | 18 | 1.122 | 109.374 | 61.990   | 0.207530  |
| 26 | C11  | c3 | 3 | 21 | 18 | 15 | 1.490 | 110.986 | -44.063  | -0.440009 |
| 27 | H7   | hx | E | 26 | 21 | 18 | 1.123 | 109.396 | -50.984  | 0.207530  |
| 28 | H8   | hx | E | 26 | 21 | 18 | 1.122 | 109.324 | -171.009 | 0.207530  |
| 29 | H9   | hx | E | 26 | 21 | 18 | 1.124 | 109.419 | 69.326   | 0.207530  |
| 30 | C9   | c3 | M | 21 | 18 | 15 | 1.497 | 108.213 | -163.547 | -0.440009 |
| 31 | H1   | hx | E | 30 | 21 | 18 | 1.122 | 109.522 | 65.160   | 0.207530  |
| 32 | H2   | hx | E | 30 | 21 | 18 | 1.123 | 109.329 | -55.030  | 0.207530  |
| 33 | H3   | hx | E | 30 | 21 | 18 | 1.122 | 109.373 | -174.888 | 0.207530  |

LOOP

C4 C3

IMPROPER

|    |    |    |     |
|----|----|----|-----|
| C4 | C2 | C3 | H12 |
| C3 | C1 | C2 | H11 |
| C2 | C6 | C1 | H10 |
| C5 | C1 | C6 | H14 |
| C4 | C6 | C5 | H13 |
| C7 | C5 | C4 | C3  |

DONE

STOP

**G6.in**

0 0 2

This is a remark line

molecule.res

G6 INT 0

CORRECT OMIT DU BEG

0.0000

|    |      |    |   |    |    |    |       |         |          |           |
|----|------|----|---|----|----|----|-------|---------|----------|-----------|
| 1  | DUMM | DU | M | 0  | -1 | -2 | 0.000 | .0      | .0       | .00000    |
| 2  | DUMM | DU | M | 1  | 0  | -1 | 1.449 | .0      | .0       | .00000    |
| 3  | DUMM | DU | M | 2  | 1  | 0  | 1.523 | 111.21  | .0       | .00000    |
| 4  | O1   | o  | M | 3  | 2  | 1  | 1.540 | 111.208 | -180.000 | -0.485836 |
| 5  | N1   | no | M | 4  | 3  | 2  | 1.204 | 89.524  | -180.000 | 0.763774  |
| 6  | O2   | o  | E | 5  | 4  | 3  | 1.208 | 120.634 | -179.945 | -0.485836 |
| 7  | C1   | ca | M | 5  | 4  | 3  | 1.479 | 120.005 | 0.000    | 0.048672  |
| 8  | C2   | ca | M | 7  | 5  | 4  | 1.405 | 120.109 | -0.000   | -0.197997 |
| 9  | H1   | ha | E | 8  | 7  | 5  | 1.105 | 121.969 | -0.000   | 0.183442  |
| 10 | C4   | ca | M | 8  | 7  | 5  | 1.397 | 119.237 | 180.000  | 0.042852  |
| 11 | C7   | c  | B | 10 | 8  | 7  | 1.529 | 120.217 | 180.000  | 0.759149  |
| 12 | O3   | o  | E | 11 | 10 | 8  | 1.261 | 117.564 | -0.000   | -0.771486 |
| 13 | O4   | o  | E | 11 | 10 | 8  | 1.261 | 117.167 | 180.000  | -0.771486 |
| 14 | C6   | ca | M | 10 | 8  | 7  | 1.396 | 119.868 | 0.000    | -0.150203 |
| 15 | H4   | ha | E | 14 | 10 | 8  | 1.103 | 118.123 | 180.000  | 0.147987  |
| 16 | C5   | ca | M | 14 | 10 | 8  | 1.398 | 120.583 | 0.000    | -0.108897 |
| 17 | H3   | ha | E | 16 | 14 | 10 | 1.099 | 120.050 | 180.000  | 0.119989  |
| 18 | C3   | ca | M | 16 | 14 | 10 | 1.390 | 120.415 | 0.000    | -0.256571 |
| 19 | H2   | ha | E | 18 | 16 | 14 | 1.101 | 120.733 | 180.000  | 0.162449  |

LOOP

C3 C1

IMPROPER

|    |    |    |    |
|----|----|----|----|
| C1 | O1 | N1 | O2 |
| C3 | C2 | C1 | N1 |
| C1 | C4 | C2 | H1 |
| C7 | C6 | C4 | C2 |
| C4 | O3 | C7 | O4 |
| C5 | C4 | C6 | H4 |
| C6 | C3 | C5 | H3 |
| C5 | C1 | C3 | H2 |

DONE

STOP

**G2.dat**

Parameters for Sample5 ligands, 25/11-15

DIHE

ca-ca-cg-n1 1 0.000 0.000 2. ! 0.00 2 1

**Figure S1.** Geometric measures employed to analyse the structures.,.

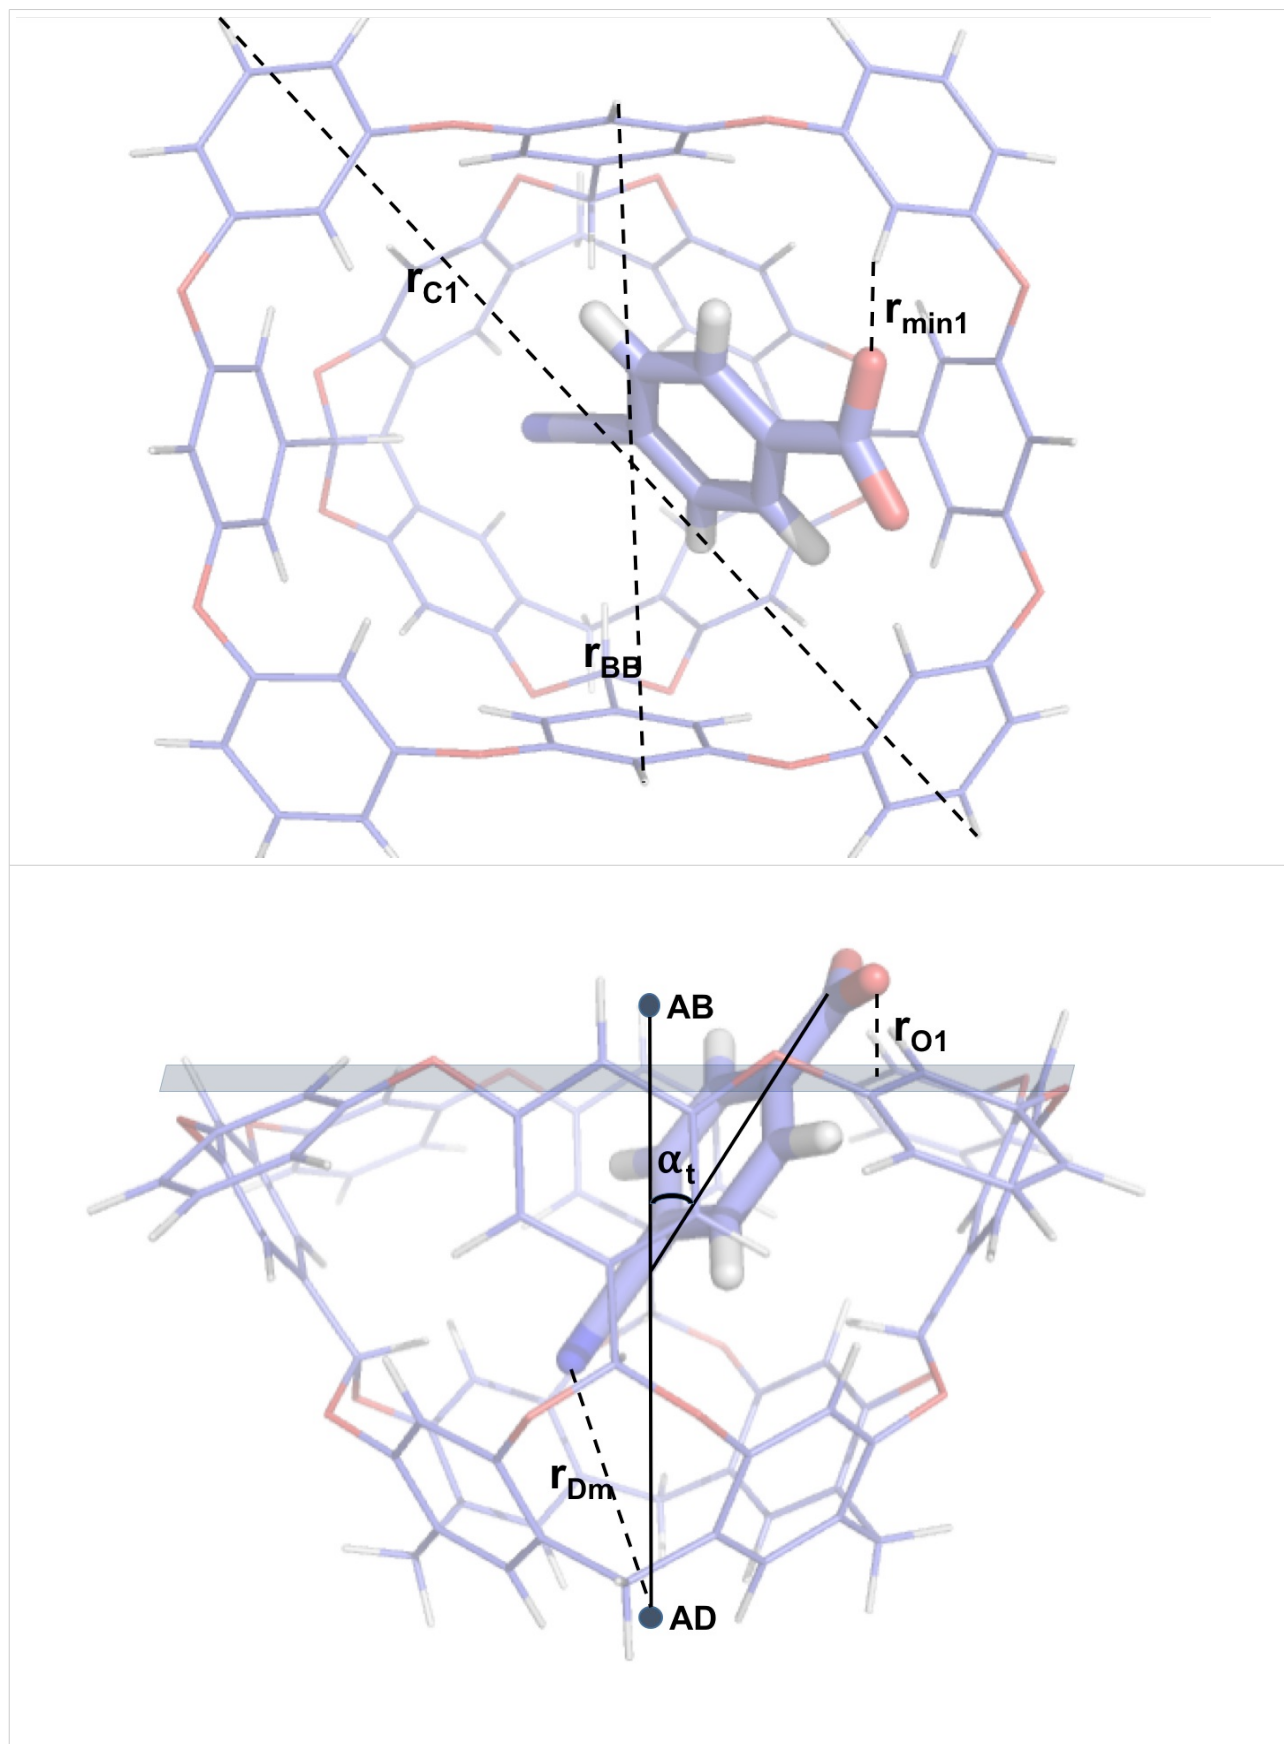

**Figure S2.** Typical snapshot of G1 in NOH during the MD simulation.

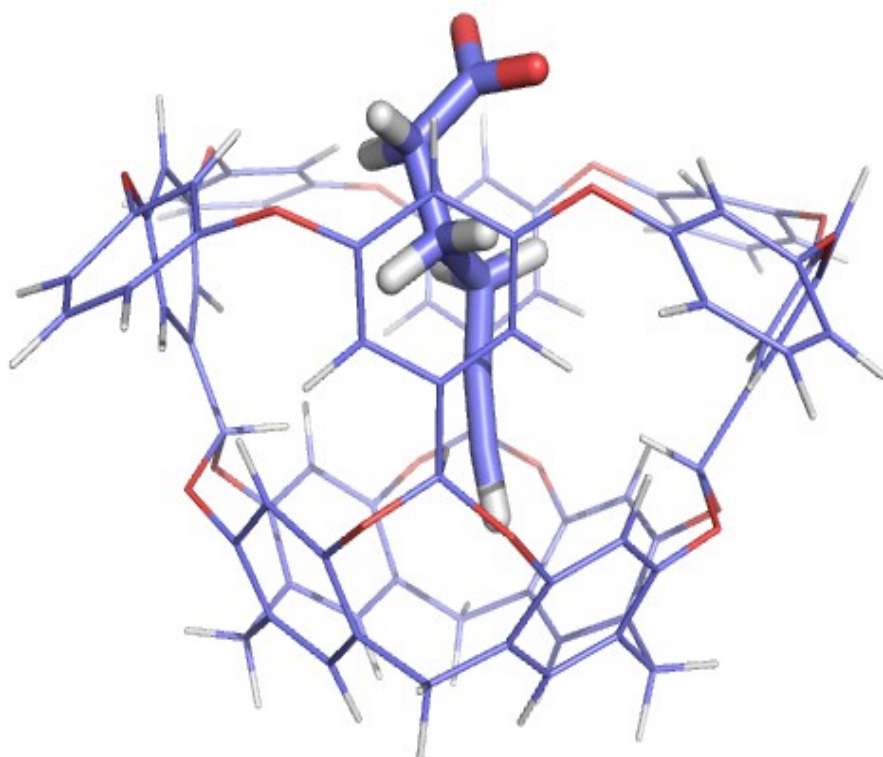

Supplement: 10822_2016_9957_MOESM1_ESM.pdf [file 10822_2016_9957_MOESM1_ESM.pdf]
